# Supplementary material for: Modelling the impact of climate variability and land-use changes in the Upper Crocodile River Basin, South Africa
Source: Research Square preprint supplement (doi:10.21203/rs.3.rs-1525364/v1), 2022-04-28
Supplement: Supplementary file 1 [file 720f26fdba614acb50ff8b1f.csv]

Date	UrbanInc-rch-19-FLOW_OUTcms
1998/1	30.9
1998/2	18.3
1998/3	12.7
1998/4	5.0
1998/5	5.3
1998/6	4.8
1998/7	5.5
1998/8	5.5
1998/9	6.4
1998/10	9.3
1998/11	28.6
1998/12	25.9
1999/1	18.1
1999/2	6.6
1999/3	7.0
1999/4	9.3
1999/5	9.5
1999/6	11.9
1999/7	8.7
1999/8	4.8
1999/9	6.0
1999/10	7.0
1999/11	9.5
1999/12	13.9
2000/1	18.0
2000/2	54.4
2000/3	37.6
2000/4	13.7
2000/5	9.2
2000/6	8.2
2000/7	9.9
2000/8	11.5
2000/9	12.8
2000/10	15.0
2000/11	16.3
2000/12	18.2
2001/1	17.9
2001/2	6.8
2001/3	13.0
2001/4	14.4
2001/5	12.3
2001/6	4.2
2001/7	4.9
2001/8	9.5
2001/9	11.0
2001/10	13.0
2001/11	23.2
2001/12	11.4
2002/1	10.6
2002/2	13.7
2002/3	5.7
2002/4	5.6
2002/5	6.6
2002/6	8.5
2002/7	6.0
2002/8	5.5
2002/9	4.6
2002/10	5.4
2002/11	8.7
2002/12	9.9
2003/1	9.7
2003/2	8.7
2003/3	9.2
2003/4	4.2
2003/5	5.1
2003/6	4.6
2003/7	3.5
2003/8	4.2
2003/9	4.6
2003/10	1.3
2003/11	1.4
2003/12	1.6
2004/1	1.6
2004/2	17.3
2004/3	17.8
2004/4	20.1
2004/5	12.5
2004/6	14.3
2004/7	12.2
2004/8	5.2
2004/9	5.2
2004/10	6.0
2004/11	8.7
2004/12	18.6
2005/1	22.2
2005/2	17.6
2005/3	13.1
2005/4	16.3
2005/5	11.1
2005/6	11.9
2005/7	7.0
2005/8	9.5
2005/9	11.1
2005/10	13.4
2005/11	15.6
2005/12	16.3
2006/1	19.6
2006/2	41.8
2006/3	23.6
2006/4	21.5
2006/5	14.5
2006/6	13.4
2006/7	14.4
2006/8	15.6
2006/9	10.9
2006/10	12.7
2006/11	21.2
2006/12	24.2
2007/1	6.1
2007/2	8.2
2007/3	5.7
2007/4	12.2
2007/5	14.2
2007/6	15.1
2007/7	14.5
2007/8	13.8
2007/9	14.0
2007/10	16.4
2007/11	18.0
2007/12	34.5
2008/1	32.3
2008/2	31.7
2008/3	22.0
2008/4	20.6
2008/5	24.1
2008/6	19.4
2008/7	12.1
2008/8	14.1
2008/9	12.5
2008/10	21.1
2008/11	23.8
2008/12	23.3
2009/1	20.8
2009/2	42.3
2009/3	28.6
2009/4	15.9
2009/5	19.0
2009/6	10.7
2009/7	11.6
2009/8	13.5
2009/9	12.8
2009/10	19.2
2009/11	30.3
2009/12	35.3
2010/1	41.1
2010/2	30.8
2010/3	35.9
2010/4	41.0
2010/5	21.6
2010/6	25.7
2010/7	23.6
2010/8	18.3
2010/9	14.0
2010/10	13.7
2010/11	9.9
2010/12	17.5
2011/1	62.5
2011/2	39.9
2011/3	26.1
2011/4	29.2
2011/5	18.8
2011/6	18.4
2011/7	19.2
2011/8	14.3
2011/9	16.7
2011/10	18.1
2011/11	39.3
2011/12	35.1
2012/1	34.5
2012/2	34.2
2012/3	26.8
2012/4	19.4
2012/5	19.0
2012/6	17.6
2012/7	18.2
2012/8	17.2
2012/9	18.9
2012/10	18.5
2012/11	13.7
2012/12	16.0
2013/1	25.8
2013/2	25.4
2013/3	25.9
2013/4	31.3
2013/5	19.4
2013/6	12.9
2013/7	15.1
2013/8	17.2
2013/9	17.3
2013/10	20.2
2013/11	21.0
2013/12	30.6
2014/1	35.6
2014/2	64.2
2014/3	46.2
2014/4	21.6
2014/5	24.3
2014/6	23.9
2014/7	20.7
2014/8	16.9
2014/9	16.6
2014/10	15.3
2014/11	17.8
2014/12	18.6
2015/1	37.2
2015/2	28.7
2015/3	26.2
2015/4	17.9
2015/5	17.6
2015/6	13.4
2015/7	14.8
2015/8	17.3
2015/9	22.5
2015/10	22.1
2015/11	23.3
2015/12	14.1
2016/1	7.4
2016/2	7.3
2016/3	7.3
2016/4	7.2
2016/5	7.2
2016/6	7.1
2016/7	7.1
2016/8	7.1
2016/9	7.3
2016/10	7.4
2016/11	11.6
2016/12	16.3
