# Supplementary material for: Modelling the impact of climate variability and land-use changes in the Upper Crocodile River Basin, South Africa
Source: Research Square preprint supplement (doi:10.21203/rs.3.rs-1525364/v1), 2022-04-28
Supplement: Supplementary file 2 [file 77f5d93e5707a128604d01cd.csv]

Date	UrbanInc-rch-26-FLOW_OUTcms
1998/1	11.1
1998/2	5.6
1998/3	3.9
1998/4	1.7
1998/5	1.9
1998/6	1.6
1998/7	1.5
1998/8	3.1
1998/9	1.5
1998/10	1.7
1998/11	10.9
1998/12	14.1
1999/1	8.4
1999/2	1.0
1999/3	0.1
1999/4	0.1
1999/5	5.6
1999/6	6.8
1999/7	3.5
1999/8	1.6
1999/9	1.7
1999/10	3.3
1999/11	3.3
1999/12	0.8
2000/1	4.6
2000/2	50.1
2000/3	15.9
2000/4	8.0
2000/5	9.2
2000/6	4.4
2000/7	4.5
2000/8	6.9
2000/9	3.8
2000/10	4.2
2000/11	10.4
2000/12	4.9
2001/1	4.9
2001/2	6.7
2001/3	1.7
2001/4	1.9
2001/5	7.5
2001/6	3.9
2001/7	3.9
2001/8	1.4
2001/9	8.8
2001/10	5.0
2001/11	3.8
2001/12	4.4
2002/1	0.4
2002/2	0.4
2002/3	0.8
2002/4	7.2
2002/5	1.4
2002/6	3.2
2002/7	3.0
2002/8	3.3
2002/9	4.3
2002/10	3.6
2002/11	4.0
2002/12	7.8
2003/1	1.4
2003/2	3.3
2003/3	4.3
2003/4	4.2
2003/5	4.6
2003/6	4.5
2003/7	5.7
2003/8	1.8
2003/9	3.0
2003/10	7.1
2003/11	0.6
2003/12	0.7
2004/1	6.8
2004/2	1.4
2004/3	1.5
2004/4	7.3
2004/5	4.2
2004/6	1.2
2004/7	3.7
2004/8	0.6
2004/9	0.9
2004/10	1.1
2004/11	1.2
2004/12	8.1
2005/1	7.6
2005/2	3.6
2005/3	1.6
2005/4	1.9
2005/5	3.2
2005/6	8.2
2005/7	3.2
2005/8	3.9
2005/9	4.3
2005/10	4.3
2005/11	8.7
2005/12	9.7
2006/1	18.7
2006/2	11.6
2006/3	13.7
2006/4	13.5
2006/5	7.0
2006/6	6.6
2006/7	6.5
2006/8	8.5
2006/9	4.7
2006/10	3.8
2006/11	4.3
2006/12	10.7
2007/1	11.1
2007/2	11.0
2007/3	3.7
2007/4	4.0
2007/5	4.1
2007/6	0.7
2007/7	0.8
2007/8	5.0
2007/9	6.2
2007/10	12.4
2007/11	12.3
2007/12	10.0
2008/1	15.4
2008/2	15.2
2008/3	16.3
2008/4	11.6
2008/5	7.0
2008/6	1.9
2008/7	3.3
2008/8	5.8
2008/9	5.6
2008/10	6.2
2008/11	13.3
2008/12	9.9
2009/1	10.9
2009/2	10.1
2009/3	12.5
2009/4	7.6
2009/5	6.7
2009/6	7.4
2009/7	9.4
2009/8	6.6
2009/9	6.6
2009/10	7.3
2009/11	5.0
2009/12	8.5
2010/1	25.5
2010/2	17.5
2010/3	9.3
2010/4	10.3
2010/5	11.8
2010/6	4.6
2010/7	6.1
2010/8	4.6
2010/9	7.5
2010/10	7.4
2010/11	4.8
2010/12	10.9
2011/1	20.9
2011/2	16.7
2011/3	12.3
2011/4	12.0
2011/5	8.1
2011/6	3.9
2011/7	6.6
2011/8	6.6
2011/9	9.3
2011/10	5.6
2011/11	6.3
2011/12	7.8
2012/1	7.0
2012/2	7.8
2012/3	9.5
2012/4	8.2
2012/5	6.8
2012/6	6.2
2012/7	7.6
2012/8	8.5
2012/9	12.7
2012/10	12.4
2012/11	13.6
2012/12	15.3
2013/1	12.0
2013/2	11.9
2013/3	10.4
2013/4	10.4
2013/5	1.6
2013/6	1.7
2013/7	4.4
2013/8	4.4
2013/9	7.8
2013/10	7.3
2013/11	8.2
2013/12	10.6
2014/1	11.8
2014/2	18.8
2014/3	21.9
2014/4	12.8
2014/5	7.9
2014/6	7.8
2014/7	7.7
2014/8	10.3
2014/9	10.2
2014/10	7.2
2014/11	14.7
2014/12	17.6
2015/1	14.4
2015/2	9.4
2015/3	8.3
2015/4	9.3
2015/5	9.2
2015/6	6.2
2015/7	6.6
2015/8	6.6
2015/9	8.2
2015/10	4.3
2015/11	7.1
2015/12	4.2
2016/1	3.5
2016/2	3.4
2016/3	3.4
2016/4	3.4
2016/5	3.4
2016/6	3.4
2016/7	3.4
2016/8	3.4
2016/9	3.4
2016/10	3.4
2016/11	6.3
2016/12	7.9
