# Supplementary material for: Modelling the impact of climate variability and land-use changes in the Upper Crocodile River Basin, South Africa
Source: Research Square preprint supplement (doi:10.21203/rs.3.rs-1525364/v1), 2022-04-28
Supplement: Supplementary file 3 [file 9a3bb7c24961ac57028141f7.csv]

Date	RainInc-rch-3-FLOW_OUTcms
1998/1	23.2
1998/2	7.7
1998/3	6.8
1998/4	12.0
1998/5	0.7
1998/6	15.3
1998/7	22.3
1998/8	13.4
1998/9	9.0
1998/10	8.9
1998/11	1.0
1998/12	39.4
1999/1	20.6
1999/2	13.8
1999/3	17.0
1999/4	18.7
1999/5	7.1
1999/6	12.4
1999/7	18.6
1999/8	20.1
1999/9	15.3
1999/10	7.6
1999/11	9.0
1999/12	1.8
2000/1	4.6
2000/2	257.2
2000/3	64.8
2000/4	48.1
2000/5	8.5
2000/6	14.2
2000/7	8.7
2000/8	16.8
2000/9	14.6
2000/10	19.0
2000/11	38.1
2000/12	29.4
2001/1	13.5
2001/2	13.8
2001/3	9.1
2001/4	8.1
2001/5	10.9
2001/6	13.2
2001/7	12.0
2001/8	15.6
2001/9	13.5
2001/10	6.1
2001/11	29.2
2001/12	15.9
2002/1	3.7
2002/2	19.7
2002/3	15.0
2002/4	2.4
2002/5	6.2
2002/6	0.6
2002/7	2.6
2002/8	19.1
2002/9	23.6
2002/10	3.4
2002/11	19.7
2002/12	14.7
2003/1	2.3
2003/2	9.9
2003/3	3.7
2003/4	1.1
2003/5	13.0
2003/6	11.0
2003/7	0.7
2003/8	5.0
2003/9	17.4
2003/10	16.0
2003/11	9.9
2003/12	5.6
2004/1	1.0
2004/2	19.7
2004/3	35.8
2004/4	5.5
2004/5	2.9
2004/6	17.3
2004/7	7.8
2004/8	9.5
2004/9	23.4
2004/10	2.2
2004/11	11.5
2004/12	5.5
2005/1	8.6
2005/2	20.6
2005/3	16.5
2005/4	3.2
2005/5	8.6
2005/6	1.3
2005/7	4.5
2005/8	5.1
2005/9	18.2
2005/10	8.3
2005/11	17.6
2005/12	5.4
2006/1	10.9
2006/2	57.3
2006/3	40.5
2006/4	8.8
2006/5	3.5
2006/6	14.2
2006/7	23.7
2006/8	9.8
2006/9	8.7
2006/10	19.2
2006/11	4.6
2006/12	9.5
2007/1	2.4
2007/2	21.1
2007/3	4.3
2007/4	2.4
2007/5	3.1
2007/6	5.7
2007/7	1.4
2007/8	22.2
2007/9	5.2
2007/10	5.7
2007/11	0.3
2007/12	15.4
2008/1	38.4
2008/2	11.6
2008/3	58.8
2008/4	1.1
2008/5	17.6
2008/6	3.5
2008/7	8.4
2008/8	20.0
2008/9	14.8
2008/10	15.1
2008/11	9.0
2008/12	0.9
2009/1	36.1
2009/2	28.7
2009/3	31.1
2009/4	12.8
2009/5	0.4
2009/6	4.1
2009/7	7.2
2009/8	15.3
2009/9	0.6
2009/10	6.2
2009/11	6.1
2009/12	28.7
2010/1	94.2
2010/2	18.3
2010/3	16.1
2010/4	35.4
2010/5	45.1
2010/6	14.1
2010/7	20.4
2010/8	15.2
2010/9	18.6
2010/10	0.7
2010/11	18.3
2010/12	86.8
2011/1	107.8
2011/2	30.5
2011/3	64.9
2011/4	46.9
2011/5	31.4
2011/6	30.8
2011/7	7.2
2011/8	25.2
2011/9	12.4
2011/10	30.8
2011/11	20.2
2011/12	33.4
2012/1	43.4
2012/2	31.8
2012/3	15.9
2012/4	5.2
2012/5	3.9
2012/6	4.4
2012/7	7.2
2012/8	16.8
2012/9	2.6
2012/10	9.5
2012/11	28.7
2012/12	37.6
2013/1	6.9
2013/2	12.5
2013/3	6.3
2013/4	23.4
2013/5	9.6
2013/6	11.2
2013/7	4.5
2013/8	0.6
2013/9	20.4
2013/10	8.9
2013/11	6.5
2013/12	33.9
2014/1	23.7
2014/2	89.9
2014/3	208.3
2014/4	31.9
2014/5	26.9
2014/6	12.3
2014/7	26.6
2014/8	6.8
2014/9	7.6
2014/10	0.7
2014/11	23.2
2014/12	23.0
2015/1	29.7
2015/2	32.4
2015/3	19.3
2015/4	18.8
2015/5	11.3
2015/6	0.7
2015/7	9.5
2015/8	10.4
2015/9	12.7
2015/10	14.4
2015/11	13.7
2015/12	19.4
2016/1	10.2
2016/2	9.7
2016/3	9.9
2016/4	9.7
2016/5	9.7
2016/6	9.7
2016/7	9.6
2016/8	10.7
2016/9	11.1
2016/10	10.4
2016/11	19.4
2016/12	17.1
