# Supplementary material for: Modelling the impact of climate variability and land-use changes in the Upper Crocodile River Basin, South Africa
Source: Research Square preprint supplement (doi:10.21203/rs.3.rs-1525364/v1), 2022-04-28
Supplement: Supplementary file 4 [file d5970a06ee38f51515d7c386.csv]

Date	RainDec-rch-13-FLOW_OUTcms
1998/1	14.4
1998/2	7.4
1998/3	2.5
1998/4	2.5
1998/5	3.0
1998/6	3.1
1998/7	6.0
1998/8	1.0
1998/9	1.9
1998/10	7.2
1998/11	12.8
1998/12	19.3
1999/1	6.1
1999/2	9.0
1999/3	1.1
1999/4	5.9
1999/5	4.0
1999/6	1.0
1999/7	1.3
1999/8	0.5
1999/9	8.5
1999/10	8.9
1999/11	0.8
1999/12	2.5
2000/1	9.7
2000/2	53.6
2000/3	25.4
2000/4	15.9
2000/5	11.5
2000/6	6.2
2000/7	2.1
2000/8	1.0
2000/9	6.5
2000/10	11.1
2000/11	15.3
2000/12	11.5
2001/1	1.4
2001/2	8.9
2001/3	6.6
2001/4	6.2
2001/5	9.5
2001/6	3.9
2001/7	12.2
2001/8	7.1
2001/9	0.3
2001/10	5.3
2001/11	20.1
2001/12	15.6
2002/1	6.9
2002/2	12.7
2002/3	7.2
2002/4	5.6
2002/5	1.1
2002/6	1.5
2002/7	7.1
2002/8	4.4
2002/9	1.3
2002/10	2.8
2002/11	1.2
2002/12	2.1
2003/1	0.1
2003/2	7.4
2003/3	1.1
2003/4	3.5
2003/5	3.7
2003/6	0.9
2003/7	5.9
2003/8	6.0
2003/9	0.1
2003/10	0.8
2003/11	0.9
2003/12	2.0
2004/1	1.4
2004/2	5.7
2004/3	12.0
2004/4	7.9
2004/5	8.2
2004/6	0.9
2004/7	3.4
2004/8	4.2
2004/9	1.9
2004/10	3.1
2004/11	7.0
2004/12	3.9
2005/1	7.1
2005/2	6.6
2005/3	6.2
2005/4	9.4
2005/5	2.0
2005/6	3.7
2005/7	0.6
2005/8	0.9
2005/9	4.2
2005/10	0.2
2005/11	4.3
2005/12	0.6
2006/1	10.5
2006/2	19.8
2006/3	15.1
2006/4	9.6
2006/5	9.5
2006/6	10.5
2006/7	0.8
2006/8	3.1
2006/9	3.0
2006/10	4.3
2006/11	7.7
2006/12	12.0
2007/1	10.8
2007/2	3.0
2007/3	3.2
2007/4	2.8
2007/5	1.1
2007/6	5.4
2007/7	5.8
2007/8	7.1
2007/9	1.0
2007/10	10.0
2007/11	8.9
2007/12	12.3
2008/1	21.1
2008/2	9.3
2008/3	17.0
2008/4	4.8
2008/5	10.6
2008/6	10.4
2008/7	7.8
2008/8	9.2
2008/9	1.5
2008/10	0.2
2008/11	4.3
2008/12	1.4
2009/1	20.7
2009/2	11.2
2009/3	10.3
2009/4	5.5
2009/5	2.1
2009/6	2.2
2009/7	8.8
2009/8	1.7
2009/9	6.9
2009/10	3.6
2009/11	11.8
2009/12	12.0
2010/1	36.6
2010/2	21.3
2010/3	7.3
2010/4	13.1
2010/5	15.2
2010/6	4.9
2010/7	11.2
2010/8	10.1
2010/9	2.0
2010/10	3.8
2010/11	4.8
2010/12	26.5
2011/1	30.4
2011/2	22.8
2011/3	23.2
2011/4	19.7
2011/5	16.8
2011/6	14.0
2011/7	8.2
2011/8	9.1
2011/9	1.1
2011/10	5.2
2011/11	10.5
2011/12	21.5
2012/1	14.2
2012/2	14.2
2012/3	4.1
2012/4	10.0
2012/5	1.1
2012/6	6.2
2012/7	3.1
2012/8	6.3
2012/9	10.7
2012/10	12.0
2012/11	11.1
2012/12	17.4
2013/1	8.9
2013/2	11.0
2013/3	2.1
2013/4	10.9
2013/5	8.6
2013/6	3.9
2013/7	4.5
2013/8	6.6
2013/9	6.2
2013/10	4.2
2013/11	13.4
2013/12	17.7
2014/1	8.6
2014/2	32.2
2014/3	53.0
2014/4	18.3
2014/5	11.8
2014/6	6.4
2014/7	9.5
2014/8	3.0
2014/9	2.1
2014/10	2.9
2014/11	13.8
2014/12	17.0
2015/1	17.8
2015/2	0.1
2015/3	4.5
2015/4	7.2
2015/5	2.6
2015/6	2.7
2015/7	2.5
2015/8	8.2
2015/9	8.7
2015/10	1.9
2015/11	0.3
2015/12	1.3
2016/1	8.4
2016/2	7.8
2016/3	8.0
2016/4	7.9
2016/5	8.0
2016/6	8.1
2016/7	8.0
2016/8	9.5
2016/9	10.1
2016/10	9.0
2016/11	18.8
2016/12	18.4
